# Supplementary material for: Next-generation sequencing identifies the natural killer cell microRNA transcriptome
Source: HighWire-hosted journal article supplement (doi:10.1101/gr.107995.110), 2010-10-08
Supplement: NK-ISOMIR-VIEWS-0.8.tar.gz [file STRAND-BREAKDOWN-ILLUMINA-KNOWN.xlsx]

## Sheet: STRAND-BREAKDOWN-ILLUMINA-KNOWN
strand call	majority vote	# alignments	# desquashed	(+) desquashed reads	(-) desquashed reads	cluster ID
+	99.8729	1393	203011	202753	258	mmu-mir-142 MI0000167 Mus musculus miR-142 stem-loop
+	100	812	511224	511224	0	mmu-mir-21 MI0000569 Mus musculus miR-21 stem-loop
+	100	677	141610	141610	0	mmu-mir-16-1 MI0000565 Mus musculus miR-16-1 stem-loop
+	100	641	139227	139227	0	mmu-mir-16-2 MI0000566 Mus musculus miR-16-2 stem-loop
+	100	597	19313	19313	0	mmu-mir-342 MI0000627 Mus musculus miR-342 stem-loop
+	99.97	577	59981	59963	18	mmu-mir-24-1 MI0000231 Mus musculus miR-24-1 stem-loop
+	99.985	577	59948	59939	9	mmu-mir-24-2 MI0000572 Mus musculus miR-24-2 stem-loop
+	100	548	7921	7921	0	mmu-mir-140 MI0000165 Mus musculus miR-140 stem-loop
+	100	505	37017	37017	0	mmu-mir-26a-2 MI0000706 Mus musculus miR-26a-2 stem-loop
+	100	504	37005	37005	0	mmu-mir-26a-1 MI0000573 Mus musculus miR-26a-1 stem-loop
+	100	488	13524	13524	0	mmu-mir-17 MI0000687 Mus musculus miR-17 stem-loop
+	100	477	25433	25433	0	mmu-mir-20a MI0000568 Mus musculus miR-20a stem-loop
+	100	450	59527	59527	0	mmu-mir-29a MI0000576 Mus musculus miR-29a stem-loop
+	100	392	41478	41478	0	mmu-mir-150 MI0000172 Mus musculus miR-150 stem-loop
+	100	382	18939	18939	0	mmu-let-7i MI0000138 Mus musculus let-7i stem-loop
+	100	379	13637	13637	0	mmu-mir-93 MI0000581 Mus musculus miR-93 stem-loop
+	100	376	40852	40852	0	mmu-let-7g MI0000137 Mus musculus let-7g stem-loop
+	100	374	11851	11851	0	mmu-let-7d MI0000405 Mus musculus let-7d stem-loop
+	100	371	17303	17303	0	mmu-mir-146a MI0000170 Mus musculus miR-146a stem-loop
+	100	365	26328	26328	0	mmu-mir-26b MI0000575 Mus musculus miR-26b stem-loop
+	100	359	21864	21864	0	mmu-mir-15a MI0000564 Mus musculus miR-15a stem-loop
+	99.8551	349	25531	25494	37	mmu-let-7c-2 MI0000560 Mus musculus let-7c-2 stem-loop
+	99.8845	348	32037	32000	37	mmu-let-7a-1 MI0000556 Mus musculus let-7a-1 stem-loop
+	99.9925	347	13351	13350	1	mmu-mir-191 MI0000233 Mus musculus miR-191 stem-loop
+	100	342	37294	37294	0	mmu-mir-29b-2 MI0000712 Mus musculus miR-29b-2 stem-loop
+	100	337	12669	12669	0	mmu-mir-103-2 MI0000588 Mus musculus miR-103-2 stem-loop
+	100	335	12663	12663	0	mmu-mir-103-1 MI0000587 Mus musculus miR-103-1 stem-loop
+	100	333	13395	13395	0	mmu-mir-10a MI0000685 Mus musculus miR-10a stem-loop
+	100	332	31866	31866	0	mmu-let-7a-2 MI0000557 Mus musculus let-7a-2 stem-loop
+	98.6569	326	8860	8741	119	mmu-let-7b MI0000558 Mus musculus let-7b stem-loop
+	100	324	14101	14101	0	mmu-mir-30d MI0000549 Mus musculus miR-30d stem-loop
+	100	323	25186	25186	0	mmu-let-7c-1 MI0000559 Mus musculus let-7c-1 stem-loop
+	100	317	36972	36972	0	mmu-mir-29b-1 MI0000143 Mus musculus miR-29b-1 stem-loop
+	100	314	42188	42188	0	mmu-let-7f-2 MI0000563 Mus musculus let-7f-2 stem-loop
+	100	308	8913	8913	0	mmu-mir-139 MI0000693 Mus musculus miR-139 stem-loop
+	100	296	9823	9823	0	mmu-mir-30e MI0000259 Mus musculus miR-30e stem-loop
+	99.98	288	39933	39925	8	mmu-let-7f-1 MI0000562 Mus musculus let-7f-1 stem-loop
+	100	283	3863	3863	0	mmu-mir-423 MI0004637 Mus musculus miR-423 stem-loop
+	100	281	15894	15894	0	mmu-mir-27a MI0000578 Mus musculus miR-27a stem-loop
+	100	274	14685	14685	0	mmu-mir-29c MI0000577 Mus musculus miR-29c stem-loop
+	100	273	9397	9397	0	mmu-mir-92a-1 MI0000719 Mus musculus miR-92a-1 stem-loop
+	100	248	5464	5464	0	mmu-mir-155 MI0000177 Mus musculus miR-155 stem-loop
+	100	244	50887	50887	0	mmu-mir-22 MI0000570 Mus musculus miR-22 stem-loop
+	100	235	15733	15733	0	mmu-mir-15b MI0000140 Mus musculus miR-15b stem-loop
+	100	220	3346	3346	0	mmu-mir-221 MI0000709 Mus musculus miR-221 stem-loop
+	100	207	2825	2825	0	mmu-mir-106a MI0000406 Mus musculus miR-106a stem-loop
+	100	206	9589	9589	0	mmu-mir-19b-2 MI0000546 Mus musculus miR-19b-2 stem-loop
+	100	205	3026	3026	0	mmu-mir-20b MI0003536 Mus musculus miR-20b stem-loop
+	100	200	9526	9526	0	mmu-mir-19b-1 MI0000718 Mus musculus miR-19b-1 stem-loop
+	100	192	4972	4972	0	mmu-mir-106b MI0000407 Mus musculus miR-106b stem-loop
+	100	187	2867	2867	0	mmu-mir-361 MI0000761 Mus musculus miR-361 stem-loop
+	100	185	2803	2803	0	mmu-mir-378 MI0000795 Mus musculus miR-378 stem-loop
+	100	185	1768	1768	0	mmu-mir-222 MI0000710 Mus musculus miR-222 stem-loop
+	100	184	3163	3163	0	mmu-mir-322 MI0000590 Mus musculus miR-322 stem-loop
+	100	183	12279	12279	0	mmu-mir-30b MI0000145 Mus musculus miR-30b stem-loop
+	100	179	2676	2676	0	mmu-mir-28 MI0000690 Mus musculus miR-28 stem-loop
+	100	174	3785	3785	0	mmu-mir-30c-1 MI0000547 Mus musculus miR-30c-1 stem-loop
+	100	166	3771	3771	0	mmu-mir-30c-2 MI0000548 Mus musculus miR-30c-2 stem-loop
+	100	166	5301	5301	0	mmu-mir-27b MI0000142 Mus musculus miR-27b stem-loop
+	100	164	1932	1932	0	mmu-mir-92a-2 MI0000580 Mus musculus miR-92a-2 stem-loop
+	100	162	2281	2281	0	mmu-mir-484 MI0003491 Mus musculus miR-484 stem-loop
+	100	161	2372	2372	0	mmu-mir-107 MI0000684 Mus musculus miR-107 stem-loop
+	100	158	2694	2694	0	mmu-mir-181a-1 MI0000697 Mus musculus miR-181a-1 stem-loop
+	100	156	3788	3788	0	mmu-mir-25 MI0000689 Mus musculus miR-25 stem-loop
+	100	151	1835	1835	0	mmu-mir-186 MI0000228 Mus musculus miR-186 stem-loop
+	100	151	2534	2534	0	mmu-mir-181c MI0000724 Mus musculus miR-181c stem-loop
+	100	150	3446	3446	0	mmu-mir-18a MI0000567 Mus musculus miR-18a stem-loop
+	100	147	2653	2653	0	mmu-mir-181a-2 MI0000223 Mus musculus mir-181a-2 stem-loop
+	100	143	958	958	0	mmu-mir-320 MI0000704 Mus musculus miR-320 stem-loop
+	100	143	2246	2246	0	mmu-mir-744 MI0004124 Mus musculus mir-744 stem-loop
+	100	142	1909	1909	0	mmu-mir-425 MI0001447 Mus musculus miR-425 stem-loop
+	100	138	2134	2134	0	mmu-mir-149 MI0000171 Mus musculus miR-149 stem-loop
+	100	127	1473	1473	0	mmu-mir-185 MI0000227 Mus musculus miR-185 stem-loop
+	100	121	2220	2220	0	mmu-mir-130b MI0000408 Mus musculus miR-130b stem-loop
+	100	114	1859	1859	0	mmu-mir-101b MI0000649 Mus musculus miR-101b stem-loop
+	100	110	996	996	0	mmu-mir-532 MI0003206 Mus musculus miR-532 stem-loop
+	100	109	892	892	0	mmu-mir-674 MI0004611 Mus musculus mir-674 stem-loop
+	100	100	674	674	0	mmu-mir-1839 MI0009991 Mus musculus miR-1839 stem-loop
+	100	98	981	981	0	mmu-mir-181d MI0005450 Mus musculus miR-181d stem-loop
+	100	98	1719	1719	0	mmu-mir-340 MI0000623 Mus musculus miR-340 stem-loop
+	100	97	1667	1667	0	mmu-mir-19a MI0000688 Mus musculus miR-19a stem-loop
+	99.8779	95	819	818	1	mmu-mir-324 MI0000595 Mus musculus miR-324 stem-loop
+	100	89	441	441	0	mmu-mir-23a MI0000571 Mus musculus miR-23a stem-loop
+	100	88	2298	2298	0	mmu-mir-652 MI0004965 Mus musculus miR-652 stem-loop
+	100	86	490	490	0	mmu-mir-339 MI0000621 Mus musculus miR-339 stem-loop
+	99.7904	85	954	952	2	mmu-mir-101a MI0000148 Mus musculus miR-101a stem-loop
+	100	84	899	899	0	mmu-mir-7a-1 MI0000728 Mus musculus miR-7a-1 stem-loop
+	100	83	643	643	0	mmu-mir-500 MI0004702 Mus musculus miR-500 stem-loop
+	99.7104	83	1381	1377	4	mmu-mir-98 MI0000586 Mus musculus miR-98 stem-loop
+	100	71	603	603	0	mmu-mir-30a MI0000144 Mus musculus miR-30a stem-loop
+	100	70	428	428	0	mmu-mir-805 MI0005204 Mus musculus miR-805 stem-loop
+	100	68	104	104	0	mmu-mir-689-2 MI0004655 Mus musculus miR-689-2 stem-loop
+	100	66	289	289	0	mmu-mir-188 MI0000230 Mus musculus miR-188 stem-loop
+	100	62	451	451	0	mmu-mir-362 MI0000763 Mus musculus miR-362 stem-loop
+	100	57	201	201	0	mmu-mir-351 MI0000643 Mus musculus miR-351 stem-loop
+	100	56	814	814	0	mmu-mir-200a MI0000554 Mus musculus miR-200a stem-loop
+	100	56	254	254	0	mmu-mir-1198 MI0006306 Mus musculus miR-1198 stem-loop
+	100	55	156	156	0	mmu-mir-671 MI0004133 Mus musculus mir-671 stem-loop
+	100	55	585	585	0	mmu-mir-200b MI0000243 Mus musculus miR-200b stem-loop
+	100	55	475	475	0	mmu-mir-125a MI0000151 Mus musculus miR-125a stem-loop
+	100	51	501	501	0	mmu-mir-194-2 MI0000733 Mus musculus miR-194-2 stem-loop
+	53.7037	51	162	87	75	mmu-mir-486 MI0003493 Mus musculus miR-486 stem-loop
+	100	50	567	567	0	mmu-mir-7a-2 MI0000729 Mus musculus miR-7a-2 stem-loop
+	100	50	447	447	0	mmu-mir-223 MI0000703 Mus musculus miR-223 stem-loop
+	100	48	528	528	0	mmu-mir-301a MI0000401 Mus musculus miR-301a stem-loop
+	100	48	243	243	0	mmu-mir-503 MI0003538 Mus musculus miR-503 stem-loop
+	100	47	877	877	0	mmu-mir-1937a MI0009926 Mus musculus miR-1937a stem-loop
+	100	47	877	877	0	mmu-mir-1937b MI0009938 Mus musculus miR-1937b stem-loop
+	100	47	604	604	0	mmu-mir-148b MI0000617 Mus musculus miR-148b stem-loop
+	100	47	329	329	0	mmu-mir-128-1 MI0000155 Mus musculus miR-128-1 stem-loop
+	100	44	543	543	0	mmu-mir-32 MI0000691 Mus musculus miR-32 stem-loop
+	100	44	193	193	0	mmu-let-7e MI0000561 Mus musculus let-7e stem-loop
+	100	44	147	147	0	mmu-mir-192 MI0000551 Mus musculus miR-192 stem-loop
+	100	43	153	153	0	mmu-mir-23b MI0000141 Mus musculus miR-23b stem-loop
+	100	43	772	772	0	mmu-mir-451 MI0001730 Mus musculus miR-451 stem-loop
+	100	42	256	256	0	mmu-mir-350 MI0000640 Mus musculus miR-350 stem-loop
+	100	42	256	256	0	mmu-mir-146b MI0004665 Mus musculus miR-146b stem-loop
+	100	42	78	78	0	mmu-mir-330 MI0000607 Mus musculus miR-330 stem-loop
+	100	40	201	201	0	mmu-mir-872 MI0005549 Mus musculus miR-872 stem-loop
+	100	40	114	114	0	mmu-mir-328 MI0000603 Mus musculus miR-328 stem-loop
+	100	39	111	111	0	mmu-mir-92b MI0005521 Mus musculus miR-92b stem-loop
+	100	38	511	511	0	mmu-mir-34c MI0000403 Mus musculus miR-34c stem-loop
+	100	37	318	318	0	mmu-mir-194-1 MI0000236 Mus musculus miR-194-1 stem-loop
+	74.4186	37	43	32	11	mmu-mir-1935 MI0009924 Mus musculus miR-1935 stem-loop
+	100	35	232	232	0	mmu-mir-128-2 MI0000726 Mus musculus miR-128-2 stem-loop
+	100	35	144	144	0	mmu-mir-296 MI0000394 Mus musculus miR-296 stem-loop
+	100	35	148	148	0	mmu-mir-181b-1 MI0000723 Mus musculus miR-181b-1 stem-loop
+	100	34	251	251	0	mmu-mir-195 MI0000237 Mus musculus miR-195 stem-loop
+	100	34	130	130	0	mmu-mir-132 MI0000158 Mus musculus miR-132 stem-loop
+	100	33	160	160	0	mmu-mir-99b MI0000147 Mus musculus miR-99b stem-loop
+	100	33	44	44	0	mmu-mir-689-1 MI0004654 Mus musculus miR-689-1 stem-loop
+	100	32	145	145	0	mmu-mir-181b-2 MI0000823 Mus musculus miR-181b-2 stem-loop
+	100	32	145	145	0	mmu-mir-126 MI0000153 Mus musculus miR-126 stem-loop
+	100	31	136	136	0	mmu-mir-345 MI0000632 Mus musculus miR-345 stem-loop
+	100	31	260	260	0	mmu-mir-429 MI0001642 Mus musculus miR-429 stem-loop
+	100	30	45	45	0	mmu-mir-574 MI0005518 Mus musculus miR-574 stem-loop
+	100	30	433	433	0	mmu-mir-450a-1 MI0001653 Mus musculus miR-450a-1 stem-loop
+	100	29	110	110	0	mmu-mir-18b MI0005483 Mus musculus miR-18b stem-loop
+	100	28	61	61	0	mmu-mir-1944 MI0009933 Mus musculus miR-1944 stem-loop
+	100	28	431	431	0	mmu-mir-450a-2 MI0003537 Mus musculus miR-450a-2 stem-loop
+	100	27	125	125	0	mmu-mir-200c MI0000694 Mus musculus miR-200c stem-loop
+	100	26	114	114	0	mmu-mir-501 MI0004703 Mus musculus miR-501 stem-loop
+	98.5714	26	70	69	1	mmu-mir-709 MI0004693 Mus musculus miR-709 stem-loop
+	100	25	67	67	0	mmu-mir-690 MI0004658 Mus musculus miR-690 stem-loop
+	100	23	50	50	0	mmu-mir-298 MI0000398 Mus musculus miR-298 stem-loop
+	100	22	168	168	0	mmu-mir-1983 MI0009990 Mus musculus miR-1983 stem-loop
+	100	22	111	111	0	mmu-mir-152 MI0000174 Mus musculus miR-152 stem-loop
+	100	22	108	108	0	mmu-mir-141 MI0000166 Mus musculus miR-141 stem-loop
+	100	21	45	45	0	mmu-mir-363 MI0000765 Mus musculus miR-363 stem-loop
+	100	21	94	94	0	mmu-mir-34a MI0000584 Mus musculus miR-34a stem-loop
+	100	21	133	133	0	mmu-mir-34b MI0000404 Mus musculus miR-34b stem-loop
+	99.4536	20	183	182	1	mmu-mir-497 MI0004636 Mus musculus miR-497 stem-loop
+	100	19	31	31	0	mmu-mir-331 MI0000609 Mus musculus miR-331 stem-loop
+	100	18	64	64	0	mmu-mir-542 MI0003522 Mus musculus miR-542 stem-loop
+	100	18	38	38	0	mmu-mir-196b MI0001151 Mus musculus miR-196b stem-loop
+	100	16	30	30	0	mmu-mir-1964 MI0009961 Mus musculus miR-1964 stem-loop
+	100	16	27	27	0	mmu-mir-700 MI0004684 Mus musculus miR-700 stem-loop
+	100	16	43	43	0	mmu-mir-130a MI0000156 Mus musculus miR-130a stem-loop
+	100	16	130	130	0	mmu-mir-122 MI0000256 Mus musculus miR-122 stem-loop
+	100	16	94	94	0	mmu-mir-33 MI0000707 Mus musculus miR-33 stem-loop
+	100	15	99	99	0	mmu-mir-301b MI0004122 Mus musculus mir-301b stem-loop
+	100	15	23	23	0	mmu-mir-1957 MI0009954 Mus musculus miR-1957 stem-loop
+	95.6522	15	23	22	1	mmu-mir-466i MI0006282 Mus musculus miR-466i stem-loop
+	100	14	71	71	0	mmu-mir-669a-1 MI0004523 Mus musculus mir-669a-1 stem-loop
+	100	14	94	94	0	mmu-mir-326 MI0000598 Mus musculus miR-326 stem-loop
+	100	14	71	71	0	mmu-mir-669a-2 MI0004667 Mus musculus miR-669a-2 stem-loop
+	100	14	76	76	0	mmu-mir-669o MI0009945 Mus musculus miR-669o stem-loop
+	100	13	22	22	0	mmu-mir-877 MI0005553 Mus musculus miR-877 stem-loop
+	100	13	114	114	0	mmu-mir-219-1 MI0000702 Mus musculus miR-219-1 stem-loop
+	100	13	125	125	0	mmu-mir-143 MI0000257 Mus musculus miR-143 stem-loop
+	100	12	44	44	0	mmu-mir-31 MI0000579 Mus musculus miR-31 stem-loop
+	100	12	21	21	0	mmu-mir-212 MI0000696 Mus musculus miR-212 stem-loop
+	66.6667	12	12	8	4	mmu-mir-1186 MI0006284 Mus musculus miR-1186 stem-loop
+	100	12	60	60	0	mmu-mir-133a-1 MI0000159 Mus musculus miR-133a-1 stem-loop
+	100	12	60	60	0	mmu-mir-133a-2 MI0000820 Mus musculus miR-133a-2 stem-loop
+	100	12	26	26	0	mmu-mir-450b MI0004705 Mus musculus miR-450b stem-loop
-	100	11	16	0	16	mmu-mir-1928 MI0009917 Mus musculus miR-1928 stem-loop
+	100	11	121	121	0	mmu-mir-685 MI0004649 Mus musculus miR-685 stem-loop
+	94.7368	11	19	18	1	mmu-mir-466k MI0006292 Mus musculus miR-466k stem-loop
-	91.6667	11	12	1	11	mmu-mir-669c MI0004673 Mus musculus miR-669c stem-loop
-	58.3333	11	12	5	7	mmu-mir-1954 MI0009949 Mus musculus miR-1954 stem-loop
+	100	11	25	25	0	mmu-mir-138-1 MI0000722 Mus musculus miR-138-1 stem-loop
+	100	11	51	51	0	mmu-mir-467d MI0005513 Mus musculus miR-467d stem-loop
+	93.3333	11	15	14	1	mmu-mir-1934 MI0009923 Mus musculus miR-1934 stem-loop
+	100	10	14	14	0	mmu-mir-466h MI0005511 Mus musculus miR-466h stem-loop
+	100	10	17	17	0	mmu-mir-466b-3 MI0005504 Mus musculus miR-466b-3 stem-loop
+	100	10	26	26	0	mmu-mir-210 MI0000695 Mus musculus miR-210 stem-loop
+	100	10	54	54	0	mmu-mir-125b-1 MI0000725 Mus musculus miR-125b-1 stem-loop
+	100	10	37	37	0	mmu-mir-505 MI0004706 Mus musculus miR-505 stem-loop
+	100	10	40	40	0	mmu-mir-151 MI0000173 Mus musculus miR-151 stem-loop
+	100	10	15	15	0	mmu-mir-199a-2 MI0000713 Mus musculus miR-199a-2 stem-loop
+	100	10	15	15	0	mmu-mir-199a-1 MI0000241 Mus musculus miR-199a-1 stem-loop
+	100	10	19	19	0	mmu-mir-466c MI0005505 Mus musculus miR-466c stem-loop
+	100	10	17	17	0	mmu-mir-466b-1 MI0005502 Mus musculus miR-466b-1 stem-loop
+	100	10	10	10	0	mmu-mir-874 MI0005479 Mus musculus miR-874 stem-loop
-	70	10	20	6	14	mmu-mir-466f-1 MI0005507 Mus musculus miR-466f-1 stem-loop
+	100	9	27	27	0	mmu-mir-338 MI0000619 Mus musculus miR-338 stem-loop
-	69.5652	9	23	7	16	mmu-mir-1-2-as MI0006283 Mus musculus miR-1-2-as stem-loop
+	100	9	17	17	0	mmu-mir-138-2 MI0000164 Mus musculus miR-138-2 stem-loop
+	100	9	15	15	0	mmu-mir-466e MI0005506 Mus musculus miR-466e stem-loop
+	100	9	44	44	0	mmu-mir-99a MI0000146 Mus musculus miR-99a stem-loop
+	100	9	38	38	0	mmu-mir-467e MI0006128 Mus musculus miR-467e stem-loop
+	100	9	28	28	0	mmu-mir-449a MI0001649 Mus musculus miR-449a stem-loop
+	100	9	14	14	0	mmu-mir-199b MI0000714 Mus musculus miR-199b stem-loop
+	100	9	32	32	0	mmu-mir-203 MI0000246 Mus musculus miR-203 stem-loop
+	100	9	15	15	0	mmu-mir-466b-2 MI0005503 Mus musculus miR-466b-2 stem-loop
+	100	9	13	13	0	mmu-mir-190b MI0005478 Mus musculus miR-190b stem-loop
+	100	9	15	15	0	mmu-mir-466a MI0002401 Mus musculus miR-466a stem-loop
+	100	9	17	17	0	mmu-mir-466d MI0005546 Mus musculus miR-466d stem-loop
+	69.5652	9	23	16	7	mmu-mir-1-2 MI0000652 Mus musculus miR-1-2 stem-loop
+	100	9	18	18	0	mmu-mir-421 MI0005496 Mus musculus miR-421 stem-loop
+	77.7778	8	9	7	2	mmu-mir-1195 MI0006303 Mus musculus miR-1195 stem-loop
+	94.1176	8	17	16	1	mmu-mir-1-1 MI0000139 Mus musculus miR-1-1 stem-loop
+	100	8	52	52	0	mmu-mir-125b-2 MI0000152 Mus musculus miR-125b-2 stem-loop
+	100	8	25	25	0	mmu-mir-467c MI0005512 Mus musculus miR-467c stem-loop
+	100	8	37	37	0	mmu-mir-467a MI0002402 Mus musculus miR-467a stem-loop
+	90	8	10	9	1	mmu-mir-669f MI0006287 Mus musculus miR-669f stem-loop
+	100	7	11	11	0	mmu-mir-10b MI0000221 Mus musculus miR-10b stem-loop
+	77.7778	7	9	7	2	mmu-mir-466f-2 MI0005508 Mus musculus miR-466f-2 stem-loop
+	88.8889	7	9	8	1	mmu-mir-9-2 MI0000157 Mus musculus miR-9-2 stem-loop
+	100	7	12	12	0	mmu-mir-1948 MI0009939 Mus musculus miR-1948 stem-loop
+	100	7	10	10	0	mmu-mir-205 MI0000248 Mus musculus miR-205 stem-loop
+	88.8889	7	9	8	1	mmu-mir-9-3 MI0000721 Mus musculus miR-9-3 stem-loop
+	100	7	649	649	0	mmu-mir-1274a MI0009969 Mus musculus miR-1274a stem-loop
+	88.8889	7	9	8	1	mmu-mir-9-1 MI0000720 Mus musculus miR-9-1 stem-loop
+	92.8571	7	14	13	1	mmu-mir-335 MI0000817 Mus musculus miR-335 stem-loop
+	100	7	36	36	0	mmu-mir-467b MI0004671 Mus musculus miR-467b stem-loop
+	81.25	6	16	13	3	mmu-mir-374 MI0004125 Mus musculus mir-374 stem-loop
+	88.8889	6	9	8	1	mmu-mir-466f-3 MI0005509 Mus musculus miR-466f-3 stem-loop
+	100	6	7	7	0	mmu-mir-147 MI0005482 Mus musculus miR-147 stem-loop
+	100	6	15	15	0	mmu-mir-100 MI0000692 Mus musculus miR-100 stem-loop
+	100	6	16	16	0	mmu-mir-96 MI0000583 Mus musculus miR-96 stem-loop
+	100	6	6	6	0	mmu-mir-669d MI0006281 Mus musculus miR-669d stem-loop
+	100	6	10	10	0	mmu-mir-182 MI0000224 Mus musculus miR-182 stem-loop
+	100	5	6	6	0	mmu-mir-148a MI0000550 Mus musculus miR-148a stem-loop
+	100	5	9	9	0	mmu-mir-1930 MI0009919 Mus musculus miR-1930 stem-loop
+	100	5	5	5	0	mmu-mir-511 MI0005554 Mus musculus miR-511 stem-loop
+	100	5	10	10	0	mmu-mir-875 MI0005551 Mus musculus miR-875 stem-loop
+	100	5	5	5	0	mmu-mir-187 MI0000229 Mus musculus miR-187 stem-loop
+	100	5	9	9	0	mmu-mir-1191 MI0006296 Mus musculus miR-1191 stem-loop
+	100	5	10	10	0	mmu-mir-193b MI0005484 Mus musculus miR-193b stem-loop
+	100	5	11	11	0	mmu-mir-598 MI0005556 Mus musculus miR-598 stem-loop
+	100	5	25	25	0	mmu-mir-144 MI0000168 Mus musculus miR-144 stem-loop
+	80	5	5	4	1	mmu-mir-1946a MI0009936 Mus musculus miR-1946a stem-loop
+	100	5	5	5	0	mmu-mir-676 MI0005003 Mus musculus miR-676 stem-loop
+	100	4	9	9	0	mmu-mir-369 MI0003535 Mus musculus miR-369 stem-loop
+	100	4	76	76	0	mmu-mir-1959 MI0009956 Mus musculus miR-1959 stem-loop
+	100	4	4	4	0	mmu-mir-133b MI0000821 Mus musculus miR-133b stem-loop
+	100	4	6	6	0	mmu-mir-365-2 MI0001645 Mus musculus miR-365-2 stem-loop
+	100	4	4	4	0	mmu-mir-715 MI0004700 Mus musculus miR-715 stem-loop
+	100	4	5	5	0	mmu-mir-669e MI0006300 Mus musculus miR-669e stem-loop
+	100	4	4	4	0	mmu-mir-1943 MI0009932 Mus musculus miR-1943 stem-loop
+	100	4	6	6	0	mmu-mir-1955 MI0009950 Mus musculus miR-1955 stem-loop
+	100	4	6	6	0	mmu-mir-297a-3 MI0005488 Mus musculus miR-297a-3 stem-loop
+	100	4	11	11	0	mmu-mir-701 MI0004685 Mus musculus miR-701 stem-loop
-	100	4	12	0	12	mmu-mir-669h MI0006289 Mus musculus miR-669h stem-loop
+	100	4	14	14	0	mmu-mir-183 MI0000225 Mus musculus miR-183 stem-loop
+	100	4	5	5	0	mmu-mir-541 MI0003521 Mus musculus miR-541 stem-loop
+	100	4	6	6	0	mmu-mir-297a-4 MI0005489 Mus musculus miR-297a-4 stem-loop
+	100	4	6	6	0	mmu-mir-297a-5 MI0005490 Mus musculus miR-297a-5 stem-loop
+	100	3	10	10	0	mmu-mir-193 MI0000235 Mus musculus miR-193 stem-loop
+	100	3	3	3	0	mmu-mir-1306 MI0009935 Mus musculus miR-1306 stem-loop
+	100	3	4	4	0	mmu-mir-365-1 MI0000768 Mus musculus miR-365-1 stem-loop
+	100	3	5	5	0	mmu-mir-669m-2 MI0009944 Mus musculus miR-669n stem-loop
+	66.6667	3	3	2	1	mmu-mir-299 MI0000399 Mus musculus miR-299 stem-loop
+	100	3	7	7	0	mmu-mir-672 MI0004258 Mus musculus mir-672 stem-loop
+	100	3	3	3	0	mmu-mir-712 MI0004696 Mus musculus miR-712 stem-loop
+	100	3	3	3	0	mmu-mir-669l MI0009942 Mus musculus miR-669l stem-loop
+	100	3	3	3	0	mmu-mir-379 MI0000796 Mus musculus miR-379 stem-loop
+	100	3	3	3	0	mmu-mir-135a-1 MI0000161 Mus musculus miR-135a-1 stem-loop
+	100	3	3	3	0	mmu-mir-1953 MI0009948 Mus musculus miR-1953 stem-loop
-	66.6667	3	3	1	2	mmu-mir-1187 MI0006285 Mus musculus miR-1187 stem-loop
+	100	3	3	3	0	mmu-mir-467f MI0006293 Mus musculus miR-467f stem-loop
+	100	3	3	3	0	mmu-mir-135a-2 MI0000715 Mus musculus miR-135a-2 stem-loop
+	100	3	5	5	0	mmu-mir-494 MI0003532 Mus musculus miR-494 stem-loop
+	100	3	3	3	0	mmu-mir-1937c MI0009953 Mus musculus miR-1937c stem-loop
+	100	3	3	3	0	mmu-mir-714 MI0004699 Mus musculus miR-714 stem-loop
+	100	2	19	19	0	mmu-mir-720 MI0004678 Mus musculus miR-720 stem-loop
+	100	2	2	2	0	mmu-mir-204 MI0000247 Mus musculus miR-204 stem-loop
+	66.6667	2	3	2	1	mmu-mir-219-2 MI0000741 Mus musculus miR-219-2 stem-loop
+	100	2	2	2	0	mmu-mir-487b MI0003534 Mus musculus miR-487b stem-loop
+	100	2	2	2	0	mmu-mir-184 MI0000226 Mus musculus miR-184 stem-loop
+	100	2	2	2	0	mmu-mir-696 MI0004677 Mus musculus miR-696 stem-loop
+	100	2	5	5	0	mmu-mir-1939 MI0009928 Mus musculus miR-1939 stem-loop
+	100	2	4	4	0	mmu-mir-708 MI0004692 Mus musculus miR-708 stem-loop
-	50	2	2	1	1	mmu-mir-297a-1 MI0000395 Mus musculus miR-297a-1 stem-loop
+	100	2	8	8	0	mmu-mir-499 MI0004676 Mus musculus miR-499 stem-loop
-	100	2	2	0	2	mmu-mir-706 MI0004690 Mus musculus miR-706 stem-loop
+	100	2	2	2	0	mmu-mir-1960 MI0009957 Mus musculus miR-1960 stem-loop
+	100	2	2	2	0	mmu-mir-214 MI0000698 Mus musculus miR-214 stem-loop
+	100	2	7	7	0	mmu-mir-376c MI0003533 Mus musculus miR-376c stem-loop
+	100	2	4	4	0	mmu-mir-669b MI0004666 Mus musculus miR-669b stem-loop
+	100	2	2	2	0	mmu-mir-1946b MI0009967 Mus musculus miR-1946b stem-loop
+	100	2	9	9	0	mmu-mir-702 MI0004686 Mus musculus miR-702 stem-loop
+	100	2	2	2	0	mmu-mir-134 MI0000160 Mus musculus miR-134 stem-loop
+	100	2	2	2	0	mmu-mir-1982 MI0009993 Mus musculus miR-1982 stem-loop
+	100	2	2	2	0	mmu-mir-669m-1 MI0009943 Mus musculus miR-669m stem-loop
+	100	2	3	3	0	mmu-mir-381 MI0000798 Mus musculus miR-381 stem-loop
+	100	2	2	2	0	mmu-mir-455 MI0004679 Mus musculus miR-455 stem-loop
+	100	2	2	2	0	mmu-mir-467g MI0006301 Mus musculus miR-467g stem-loop
+	100	2	2	2	0	mmu-mir-669a-3 MI0004668 Mus musculus miR-669a-3 stem-loop
+	100	2	2	2	0	mmu-mir-7b MI0000730 Mus musculus miR-7b stem-loop
+	100	2	2	2	0	mmu-mir-382 MI0000799 Mus musculus miR-382 stem-loop
+	100	2	5	5	0	mmu-mir-127 MI0000154 Mus musculus miR-127 stem-loop
+	100	1	1	1	0	mmu-mir-504 MI0005515 Mus musculus miR-504 stem-loop
+	100	1	1	1	0	mmu-mir-449c MI0004645 Mus musculus miR-449c stem-loop
+	100	1	1	1	0	mmu-mir-693 MI0004662 Mus musculus miR-693 stem-loop
+	100	1	1	1	0	mmu-mir-1981 MI0009992 Mus musculus miR-1981 stem-loop
+	100	1	1	1	0	mmu-mir-466j MI0006295 Mus musculus miR-466j stem-loop
+	100	1	1	1	0	mmu-mir-196a-1 MI0000552 Mus musculus miR-196a-1 stem-loop
+	100	1	1	1	0	mmu-mir-202 MI0000245 Mus musculus miR-202 stem-loop
+	100	1	1	1	0	mmu-mir-1950 MI0009941 Mus musculus miR-1950 stem-loop
+	100	1	4	4	0	mmu-mir-224 MI0000711 Mus musculus miR-224 stem-loop
+	100	1	1	1	0	mmu-mir-490 MI0005002 Mus musculus miR-490 stem-loop
+	100	1	5	5	0	mmu-mir-124-1 MI0000716 Mus musculus miR-124-1 stem-loop
+	100	1	1	1	0	mmu-mir-466f-4 MI0006291 Mus musculus miR-466f-4 stem-loop
+	100	1	2	2	0	mmu-mir-1936 MI0009925 Mus musculus miR-1936 stem-loop
+	100	1	1	1	0	mmu-mir-698 MI0004682 Mus musculus miR-698 stem-loop
+	100	1	1	1	0	mmu-mir-377 MI0000794 Mus musculus miR-377 stem-loop
+	100	1	1	1	0	mmu-mir-297a-2 MI0000397 Mus musculus miR-297a-2 stem-loop
+	100	1	1	1	0	mmu-mir-493 MI0005514 Mus musculus miR-493 stem-loop
+	100	1	1	1	0	mmu-mir-153 MI0000175 Mus musculus miR-153 stem-loop
+	100	1	2	2	0	mmu-mir-431 MI0001524 Mus musculus miR-431 stem-loop
+	100	1	1	1	0	mmu-mir-300 MI0000400 Mus musculus miR-300 stem-loop
+	100	1	1	1	0	mmu-mir-329 MI0000605 Mus musculus miR-329 stem-loop
+	100	1	1	1	0	mmu-mir-452 MI0001734 Mus musculus miR-452 stem-loop
+	100	1	1	1	0	mmu-mir-208a MI0000555 Mus musculus miR-208a stem-loop
+	100	1	1	1	0	mmu-mir-216a MI0000699 Mus musculus miR-216a stem-loop
+	100	1	1	1	0	mmu-mir-211 MI0000708 Mus musculus miR-211 stem-loop
+	100	1	3	3	0	mmu-mir-411 MI0001163 Mus musculus miR-411 stem-loop
+	100	1	1	1	0	mmu-mir-375 MI0000792 Mus musculus miR-375 stem-loop
+	100	1	1	1	0	mmu-mir-190 MI0000232 Mus musculus miR-190 stem-loop
+	100	1	1	1	0	mmu-mir-297a-6 MI0005491 Mus musculus miR-297a-6 stem-loop
+	100	1	1	1	0	mmu-mir-196a-2 MI0000553 Mus musculus miR-196a-2 stem-loop
+	100	1	1	1	0	mmu-mir-409 MI0001160 Mus musculus miR-409 stem-loop
+	100	1	1	1	0	mmu-mir-206 MI0000249 Mus musculus miR-206 stem-loop
+	100	1	1	1	0	mmu-mir-467h MI0006302 Mus musculus miR-467h stem-loop
+	100	1	1	1	0	mmu-mir-802 MI0004249 Mus musculus mir-802 stem-loop
+	100	1	5	5	0	mmu-mir-124-2 MI0000717 Mus musculus miR-124-2 stem-loop
+	100	1	2	2	0	mmu-mir-592 MI0004127 Mus musculus mir-592 stem-loop
-	100	1	1	0	1	mmu-mir-1196 MI0006304 Mus musculus miR-1196 stem-loop
+	100	1	5	5	0	mmu-mir-124-3 MI0000150 Mus musculus miR-124-3 stem-loop
+	100	1	1	1	0	mmu-mir-1927 MI0009914 Mus musculus miR-1927 stem-loop
+	100	1	1	1	0	mmu-mir-1895 MI0008316 Mus musculus miR-1895 stem-loop
+	100	1	1	1	0	mmu-mir-1940 MI0009929 Mus musculus miR-1940 stem-loop
