# Supplementary material for: Next-generation sequencing identifies the natural killer cell microRNA transcriptome
Source: HighWire-hosted journal article supplement (doi:10.1101/gr.107995.110), 2010-10-08
Supplement: NK-ISOMIR-VIEWS-0.8.tar.gz [file STRAND-BREAKDOWN-ILLUMINA-NOVEL.xlsx]

## Sheet: STRAND-BREAKDOWN-ILLUMINA-NOVEL
strand call	majority vote	# alignments	# desquashed	(+) desquashed reads	(-) desquashed reads	cluster ID
+	100	357	4919	4919	0	CLUSTER-251
+	100	176	1082	1082	0	CLUSTER-170
+	100	166	1045	1045	0	CLUSTER-242
+	77.8547	159	1156	900	256	CLUSTER-892
-	63.3333	159	750	275	475	CLUSTER-1197
-	100	138	254	0	254	CLUSTER-528
+	100	127	495	495	0	CLUSTER-327
-	100	123	2273	0	2273	CLUSTER-99
-	100	108	961	0	961	CLUSTER-315
+	100	107	1275	1275	0	CLUSTER-147
+	100	106	614	614	0	CLUSTER-263
-	100	103	1043	0	1043	CLUSTER-158
-	100	101	1222	0	1222	CLUSTER-164
-	100	100	650	0	650	CLUSTER-244
+	100	100	674	674	0	CLUSTER-241
-	100	96	7220	0	7220	CLUSTER-79
-	100	96	7220	0	7220	CLUSTER-78
-	100	96	7220	0	7220	CLUSTER-80
-	100	93	527	0	527	CLUSTER-283
-	100	78	184	0	184	CLUSTER-562
+	100	74	494	494	0	CLUSTER-1165
+	100	72	237	237	0	CLUSTER-430
-	100	72	237	0	237	CLUSTER-427
-	100	72	440	0	440	CLUSTER-320
+	100	71	1117	1117	0	CLUSTER-141
-	100	69	1115	0	1115	CLUSTER-144
+	100	66	301	301	0	CLUSTER-425
-	100	64	962	0	962	CLUSTER-178
+	100	63	397	397	0	CLUSTER-393
-	100	62	993	0	993	CLUSTER-187
-	100	61	1107	0	1107	CLUSTER-140
+	100	61	295	295	0	CLUSTER-442
+	100	59	293	293	0	CLUSTER-445
-	100	58	117	0	117	CLUSTER-1140
+	100	57	219	219	0	CLUSTER-542
-	100	56	112	0	112	CLUSTER-240
+	100	56	463	463	0	CLUSTER-388
-	98.4362	54	2494	39	2455	CLUSTER-85
-	100	54	193	0	193	CLUSTER-553
+	100	53	320	320	0	CLUSTER-1483
+	100	44	135	135	0	CLUSTER-912
-	100	42	198	0	198	CLUSTER-645
+	100	37	1288	1288	0	CLUSTER-152
-	100	37	586	0	586	CLUSTER-529
-	100	36	864	0	864	CLUSTER-215
-	100	35	863	0	863	CLUSTER-221
+	100	35	581	581	0	CLUSTER-598
+	100	35	95	95	0	CLUSTER-1070
-	100	35	863	0	863	CLUSTER-219
-	100	34	2356	0	2356	CLUSTER-163
+	100	33	122	122	0	CLUSTER-945
+	99.687	33	639	637	2	CLUSTER-292
+	99.5312	33	640	637	3	CLUSTER-193
-	97.9866	32	149	3	146	CLUSTER-175
+	100	32	332	332	0	CLUSTER-350
+	100	31	138	138	0	CLUSTER-712
-	100	31	156	0	156	CLUSTER-1275
-	100	31	158	0	158	CLUSTER-719
-	100	30	232	0	232	CLUSTER-424
+	100	29	289	289	0	CLUSTER-456
+	100	29	367	367	0	CLUSTER-593
+	100	29	235	235	0	CLUSTER-793
+	100	28	88	88	0	CLUSTER-1284
-	100	28	880	0	880	CLUSTER-161
-	100	28	192	0	192	CLUSTER-740
+	100	27	214	214	0	CLUSTER-206
+	99.8261	26	575	574	1	CLUSTER-256
-	100	26	263	0	263	CLUSTER-600
-	100	26	263	0	263	CLUSTER-602
+	100	26	539	539	0	CLUSTER-273
+	100	26	98	98	0	CLUSTER-959
-	100	25	181	0	181	CLUSTER-703
+	100	25	75	75	0	CLUSTER-1186
-	100	25	374	0	374	CLUSTER-1059
-	100	25	248	0	248	CLUSTER-621
-	100	24	904	0	904	CLUSTER-159
+	100	23	224	224	0	CLUSTER-266
+	100	23	100	100	0	CLUSTER-1057
-	100	23	147	0	147	CLUSTER-900
+	87.8049	22	123	108	15	CLUSTER-207
-	100	22	83	0	83	CLUSTER-104
-	98.8095	21	588	7	581	CLUSTER-295
+	100	21	387	387	0	CLUSTER-368
+	100	21	38	38	0	CLUSTER-243
-	100	20	219	0	219	CLUSTER-587
-	100	20	113	0	113	CLUSTER-936
-	100	20	76	0	76	CLUSTER-1276
+	100	19	253	253	0	CLUSTER-403
+	100	18	91	91	0	CLUSTER-586
+	100	18	635	635	0	CLUSTER-405
-	100	18	243	0	243	CLUSTER-367
+	100	18	120	120	0	CLUSTER-908
+	100	17	57	57	0	CLUSTER-1435
-	100	17	294	0	294	CLUSTER-1073
-	97	17	100	3	97	CLUSTER-465
+	100	16	92	92	0	CLUSTER-1087
-	100	16	95	0	95	CLUSTER-914
+	100	15	60	60	0	CLUSTER-699
-	100	15	145	0	145	CLUSTER-684
+	100	15	57	57	0	CLUSTER-1146
-	100	15	63	0	63	CLUSTER-1166
-	100	14	394	0	394	CLUSTER-347
+	100	14	76	76	0	CLUSTER-1332
+	100	14	108	108	0	CLUSTER-884
+	100	14	394	394	0	CLUSTER-348
+	100	13	53	53	0	CLUSTER-1291
-	100	13	234	0	234	CLUSTER-564
-	100	13	92	0	92	CLUSTER-1155
-	100	13	188	0	188	CLUSTER-613
-	100	11	112	0	112	CLUSTER-1214
-	100	11	106	0	106	CLUSTER-907
-	100	10	28	0	28	CLUSTER-40
+	100	10	89	89	0	CLUSTER-982
-	100	10	27	0	27	CLUSTER-890
+	100	9	72	72	0	CLUSTER-1210
+	100	9	143	143	0	CLUSTER-694
-	100	9	424	0	424	CLUSTER-333
+	100	9	560	560	0	CLUSTER-86
+	100	9	47	47	0	CLUSTER-1118
+	100	9	67	67	0	CLUSTER-1412
-	53.3333	8	15	7	8	CLUSTER-1021
+	100	8	105	105	0	CLUSTER-744
-	100	8	83	0	83	CLUSTER-1196
+	100	8	419	419	0	CLUSTER-313
+	100	8	40	40	0	CLUSTER-753
+	81.8182	8	22	18	4	CLUSTER-217
-	100	7	56	0	56	CLUSTER-1201
-	100	7	95	0	95	CLUSTER-534
+	100	7	154	154	0	CLUSTER-702
-	100	7	153	0	153	CLUSTER-736
-	100	7	84	0	84	CLUSTER-1137
+	100	7	147	147	0	CLUSTER-1017
-	100	6	7	0	7	CLUSTER-411
-	100	6	49	0	49	CLUSTER-798
+	100	6	76	76	0	CLUSTER-1225
+	100	6	147	147	0	CLUSTER-720
+	100	6	15	15	0	CLUSTER-1357
-	100	5	89	0	89	CLUSTER-552
-	100	5	183	0	183	CLUSTER-595
+	100	5	61	61	0	CLUSTER-1164
-	100	5	10	0	10	CLUSTER-1102
+	100	5	69	69	0	CLUSTER-1353
+	100	4	8	8	0	CLUSTER-213
-	100	4	9	0	9	CLUSTER-813
+	100	4	5	5	0	CLUSTER-1024
+	100	4	61	61	0	CLUSTER-1227
-	100	4	151	0	151	CLUSTER-737
+	100	4	142	142	0	CLUSTER-735
-	100	4	5	0	5	CLUSTER-525
-	100	3	59	0	59	CLUSTER-1378
+	100	3	116	116	0	CLUSTER-697
+	100	3	6	6	0	CLUSTER-1003
+	100	3	20	20	0	CLUSTER-1316
+	100	3	11	11	0	CLUSTER-757
+	100	3	3	3	0	CLUSTER-346
-	100	2	7	0	7	CLUSTER-707
+	100	2	36	36	0	CLUSTER-1109
+	100	2	9	9	0	CLUSTER-1206
+	100	2	26	26	0	CLUSTER-768
+	100	2	2	2	0	CLUSTER-1232
+	100	2	3	3	0	CLUSTER-226
+	100	2	5	5	0	CLUSTER-1211
-	100	2	3	0	3	CLUSTER-208
+	66.6667	2	3	2	1	CLUSTER-1469
+	100	1	1	1	0	CLUSTER-1117
-	100	1	2	0	2	CLUSTER-1459
+	100	1	1	1	0	CLUSTER-1311
-	100	1	1	0	1	CLUSTER-966
+	100	1	2	2	0	CLUSTER-441
+	100	1	1	1	0	CLUSTER-436
-	100	1	1	0	1	CLUSTER-66
+	100	1	1	1	0	CLUSTER-1262
+	100	1	1	1	0	CLUSTER-941
-	100	1	11	0	11	CLUSTER-1129
+	100	1	1	1	0	CLUSTER-1029
+	100	1	271	271	0	CLUSTER-399
-	100	1	1	0	1	CLUSTER-652
+	100	1	13	13	0	CLUSTER-1101
+	100	1	4	4	0	CLUSTER-1175
+	100	1	6	6	0	CLUSTER-1264
-	100	1	1	0	1	CLUSTER-1204
+	100	1	2	2	0	CLUSTER-149
-	100	1	1	0	1	CLUSTER-1013
-	100	1	1	0	1	CLUSTER-933
-	100	1	1	0	1	CLUSTER-794
-	100	1	24	0	24	CLUSTER-763
+	100	1	1	1	0	CLUSTER-1020
+	100	1	2	2	0	CLUSTER-786
+	100	1	5	5	0	CLUSTER-39
